# Supplementary material for: Influence of childhood trauma on the treatment outcomes of pharmacological and/or psychological interventions for adolescents and adults with bipolar disorder: protocol for a systematic review and meta-analysis
Source: PubMed Central journal article supplement — BMJ Open. 2021 Apr 29;11(4):e044569. doi: 10.1136/bmjopen-2020-044569 (PMC8094386; doi:10.1136/bmjopen-2020-044569), 2021-04-29
Supplement: bmjopen-2020-044569supp001.pdf [file bmjopen-2020-044569supp001.pdf]

Supplementary Material

BMJ Open

**Supplementary Table 1 The search strategy for MEDLINE Complete**

| Number | Search Terms                                                                                          |
|--------|-------------------------------------------------------------------------------------------------------|
| S44    | S12 AND S26 AND S42 (only English publications)                                                       |
| S43    | S12 AND S26 AND S42                                                                                   |
| S42    | S27 or S28 or S29 or S30 or S31 or S32 or S33 or S34 or S35 or S36 or S37 or S38 or S39 or S40 or S41 |
| S41    | TI psychoeducation or AB psychoeducation                                                              |
| S40    | TI antipsychotic* or AB antipsychotic*                                                                |
| S39    | TI antidepressant* or AB antidepressant*                                                              |
| S38    | TI "mood stabilizers" or AB "mood stabilizers"                                                        |
| S37    | TI "mood stabilisers" or AB "mood stabilisers"                                                        |
| S36    | TI intervention* or AB intervention*                                                                  |
| S35    | TI therap* or AB therap*                                                                              |
| S34    | TI treatment* or AB treatment*                                                                        |
| S33    | (MH "treatment outcome")                                                                              |
| S32    | (MH "lithium")                                                                                        |
| S31    | (MH "tranquilizing agents+")                                                                          |
| S30    | (MH "antidepressive agents+")                                                                         |
| S29    | (MH "drug therapy")                                                                                   |
| S28    | (MH "cognitive behavioral therapy+")                                                                  |
| S27    | (MH "psychotherapy+")                                                                                 |
| S26    | S13 or S14 or S15 or S16 or S17 or S18 or S19 or S20 or S21 or S22 or S23 or S24 or S25               |
| S25    | TI psychological trauma or AB psychological trauma                                                    |
| S24    | TI (early AND trauma*) or AB (early AND trauma*)                                                      |
| S23    | TI (adverse AND child* AND experience*) or AB (adverse AND child* AND experience*)                    |
| S22    | TI (child* AND neglect) or AB (child* AND neglect)                                                    |
| S21    | TI (child* AND abuse) or AB (child* AND abuse)                                                        |
| S20    | TI (child* AND maltreatment) or AB (child* AND maltreatment)                                          |
| S19    | TI (child* AND trauma) or AB (child* AND trauma)                                                      |
| S18    | (MH "domestic violence")                                                                              |
| S17    | (MH "psychological trauma+")                                                                          |
| S16    | (MH "battered child syndrome")                                                                        |
| S15    | (MH "child abuse+")                                                                                   |
| S14    | (MH "adverse childhood experiences")                                                                  |
| S13    | (MH "adult survivors of child adverse events+")                                                       |
| S12    | S1 or S2 or S3 or S4 or S5 or S6 or S7 or S8 or S9 or S10 or S11                                      |
| S11    | TI BPAD OR AB BPAD                                                                                    |
| S10    | TI BPD OR AB BPD                                                                                      |
| S9     | TI BD OR AB BD                                                                                        |
| S8     | TI hypomanic OR AB hypomanic                                                                          |
| S7     | TI hypomania OR AB hypomania                                                                          |
| S6     | TI manic OR AB manic                                                                                  |
| S5     | TI mania OR AB mania                                                                                  |
| S4     | TI cyclothymi* OR AB cyclothymi*                                                                      |
| S3     | TI bipolar OR AB bipolar                                                                              |

Supplementary Material

BMJ Open

S2 (MH "cyclothymic disorder")  
S1 (MH "bipolar and related disorders+")

Supplementary Material

BMJ Open

**Supplementary Table 2 The search strategy for Embase**

| Number | Search Terms                                                                                                 |
|--------|--------------------------------------------------------------------------------------------------------------|
| S47    | #46 AND 'article'/it AND [english]/lim                                                                       |
| S46    | #12 AND #28 AND #45                                                                                          |
| S45    | #29 or #30 or #31 or #32 or #33 or #34 or #35 or #36 or #37 or #38 or #39 or #40 or #41 or #42 or #43 or #44 |
| S44    | psychoeducation:ti,ab                                                                                        |
| S43    | antipsychotic*:ti,ab                                                                                         |
| S42    | antidepressant*:ti,ab                                                                                        |
| S41    | 'mood stabilizers':ti,ab                                                                                     |
| S40    | 'mood stabilisers':ti,ab                                                                                     |
| S39    | intervention*:ti,ab                                                                                          |
| S38    | therap*:ti,ab                                                                                                |
| S37    | treatment*:ti,ab                                                                                             |
| S36    | 'treatment outcome'/de                                                                                       |
| S35    | 'lithium'/de                                                                                                 |
| S34    | 'neuroleptic agent'/exp                                                                                      |
| S33    | 'antidepressant agent'/exp                                                                                   |
| S32    | 'drug therapy'/de                                                                                            |
| S31    | 'cognitive behavioral therapy'/exp                                                                           |
| S30    | 'psychotherapy'/exp                                                                                          |
| S29    | 'intervention study'/de                                                                                      |
| S28    | #13 or #14 or #15 or #16 or #17 or #18 or #19 or #20 or #21 or #22 or #23 or #24 or #25 or #26 or #27        |
| S27    | psychological NEAR/5 trauma:ti,ab                                                                            |
| S26    | (early AND trauma*):ti,ab                                                                                    |
| S25    | (adverse AND child* AND experience*):ti,ab                                                                   |
| S24    | (child* AND neglect):ti,ab                                                                                   |
| S23    | (child* AND abuse):ti,ab                                                                                     |
| S22    | (child* AND maltreatment):ti,ab                                                                              |
| S21    | (child* AND trauma):ti,ab                                                                                    |
| S20    | 'domestic violence'/de                                                                                       |
| S19    | 'psychotrauma'/exp                                                                                           |
| S18    | 'battered child syndrome'/de                                                                                 |
| S17    | 'child abuse survivor'/exp                                                                                   |
| S16    | 'child abuse'/exp                                                                                            |
| S15    | 'childhood trauma survivor'/de                                                                               |
| S14    | 'childhood trauma'/de                                                                                        |
| S13    | 'childhood adversity'/de                                                                                     |
| S12    | #1 or #2 or #3 or #4 or #5 or #6 or #7 or #8 or #9 or #10 or #11                                             |
| S11    | BPAD:ti,ab                                                                                                   |
| S10    | BPD:ti,ab                                                                                                    |
| S9     | BD:ti,ab                                                                                                     |
| S8     | hypomanic:ti,ab                                                                                              |
| S7     | hypomania:ti,ab                                                                                              |
| S6     | manic:ti,ab                                                                                                  |
| S5     | mania:ti,ab                                                                                                  |

## Supplementary Material

BMJ Open

|    |                        |
|----|------------------------|
| S4 | cyclothymi*:ti,ab      |
| S3 | bipolar:ti,ab          |
| S2 | 'mania'/exp            |
| S1 | 'bipolar disorder'/exp |

---

Supplementary Material

BMJ Open

**Supplementary Table 3 The search strategy for PsycINFO**

| Number | Search Terms                                                                                                                                                                                                                                                                                                                                                                                                                                                                                                                                                                                                                                                                                                                                                                                                                                                                                                                                                                                                                                                                                                                                                                                                                                                                                                                                                                                                                                                                                                                                               |
|--------|------------------------------------------------------------------------------------------------------------------------------------------------------------------------------------------------------------------------------------------------------------------------------------------------------------------------------------------------------------------------------------------------------------------------------------------------------------------------------------------------------------------------------------------------------------------------------------------------------------------------------------------------------------------------------------------------------------------------------------------------------------------------------------------------------------------------------------------------------------------------------------------------------------------------------------------------------------------------------------------------------------------------------------------------------------------------------------------------------------------------------------------------------------------------------------------------------------------------------------------------------------------------------------------------------------------------------------------------------------------------------------------------------------------------------------------------------------------------------------------------------------------------------------------------------------|
| S232   | S15 AND S33 AND S230<br>(only English publications; academic journals)                                                                                                                                                                                                                                                                                                                                                                                                                                                                                                                                                                                                                                                                                                                                                                                                                                                                                                                                                                                                                                                                                                                                                                                                                                                                                                                                                                                                                                                                                     |
| S231   | S15 AND S33 AND S230                                                                                                                                                                                                                                                                                                                                                                                                                                                                                                                                                                                                                                                                                                                                                                                                                                                                                                                                                                                                                                                                                                                                                                                                                                                                                                                                                                                                                                                                                                                                       |
| S230   | S34 or S35 or S36 or S37 or S38 or S39 or S40 or S41 or S42 or S43 or S44 or S45 or S46 or S47 or S48 or S49 or S50 or S51 or S52 or S53 or S54 or S55 or S56 or S57 or S58 or S59 or S60 or S61 or S62 or S63 or S64 or S65 or S66 or S67 or S68 or S69 or S70 or S71 or S72 or S73 or S74 or S75 or S76 or S77 or S78 or S79 or S80 or S81 or S82 or S83 or S84 or S85 or S86 or S87 or S88 or S89 or S90 or S91 or S92 or S93 or S94 or S95 or S96 or S97 or S98 or S99 or S100 or S101 or S102 or S103 or S104 or S105 or S106 or S107 or S108 or S109 or S110 or S111 or S112 or S113 or S114 or S115 or S116 or S117 or S118 or S119 or S120 or S121 or S122 or S123 or S124 or S125 or S126 or S127 or S128 or S129 or S130 or S131 or S132 or S133 or S134 or S135 or S136 or S137 or S138 or S139 or S140 or S141 or S142 or S143 or S144 or S145 or S146 or S147 or S148 or S149 or S150 or S151 or S152 or S153 or S154 or S155 or S156 or S157 or S158 or S159 or S160 or S161 or S162 or S163 or S164 or S165 or S166 or S167 or S168 or S169 or S170 or S171 or S172 or S173 or S174 or S175 or S176 or S177 or S178 or S179 or S180 or S181 or S182 or S183 or S184 or S185 or S186 or S187 or S188 or S189 or S190 or S191 or S192 or S193 or S194 or S195 or S196 or S197 or S198 or S199 or S200 or S201 or S202 or S203 or S204 or S205 or S206 or S207 or S208 or S209 or S210 or S211 or S212 or S213 or S214 or S215 or S216 or S217 or S218 or S219 or S220 or S221 or S222 or S223 or S224 or S225 or S226 or S227 or S228 or S229 |
| S229   | TI psychoeducation or AB psychoeducation                                                                                                                                                                                                                                                                                                                                                                                                                                                                                                                                                                                                                                                                                                                                                                                                                                                                                                                                                                                                                                                                                                                                                                                                                                                                                                                                                                                                                                                                                                                   |
| S228   | TI antipsychotic* or AB antipsychotic*                                                                                                                                                                                                                                                                                                                                                                                                                                                                                                                                                                                                                                                                                                                                                                                                                                                                                                                                                                                                                                                                                                                                                                                                                                                                                                                                                                                                                                                                                                                     |
| S227   | TI antidepressant* or AB antidepressant*                                                                                                                                                                                                                                                                                                                                                                                                                                                                                                                                                                                                                                                                                                                                                                                                                                                                                                                                                                                                                                                                                                                                                                                                                                                                                                                                                                                                                                                                                                                   |
| S226   | TI "mood stabilizers" or AB "mood stabilizers"                                                                                                                                                                                                                                                                                                                                                                                                                                                                                                                                                                                                                                                                                                                                                                                                                                                                                                                                                                                                                                                                                                                                                                                                                                                                                                                                                                                                                                                                                                             |
| S225   | TI "mood stabilisers" or AB "mood stabilisers"                                                                                                                                                                                                                                                                                                                                                                                                                                                                                                                                                                                                                                                                                                                                                                                                                                                                                                                                                                                                                                                                                                                                                                                                                                                                                                                                                                                                                                                                                                             |
| S224   | TI intervention* or AB intervention*                                                                                                                                                                                                                                                                                                                                                                                                                                                                                                                                                                                                                                                                                                                                                                                                                                                                                                                                                                                                                                                                                                                                                                                                                                                                                                                                                                                                                                                                                                                       |
| S223   | TI therap* or AB therap*                                                                                                                                                                                                                                                                                                                                                                                                                                                                                                                                                                                                                                                                                                                                                                                                                                                                                                                                                                                                                                                                                                                                                                                                                                                                                                                                                                                                                                                                                                                                   |
| S222   | TI treatment* or AB treatment*                                                                                                                                                                                                                                                                                                                                                                                                                                                                                                                                                                                                                                                                                                                                                                                                                                                                                                                                                                                                                                                                                                                                                                                                                                                                                                                                                                                                                                                                                                                             |
| S221   | DE "Lithium"                                                                                                                                                                                                                                                                                                                                                                                                                                                                                                                                                                                                                                                                                                                                                                                                                                                                                                                                                                                                                                                                                                                                                                                                                                                                                                                                                                                                                                                                                                                                               |
| S220   | DE "Tetrabenazine"                                                                                                                                                                                                                                                                                                                                                                                                                                                                                                                                                                                                                                                                                                                                                                                                                                                                                                                                                                                                                                                                                                                                                                                                                                                                                                                                                                                                                                                                                                                                         |
| S219   | DE "Sulpiride"                                                                                                                                                                                                                                                                                                                                                                                                                                                                                                                                                                                                                                                                                                                                                                                                                                                                                                                                                                                                                                                                                                                                                                                                                                                                                                                                                                                                                                                                                                                                             |
| S218   | DE "Spiroperidol"                                                                                                                                                                                                                                                                                                                                                                                                                                                                                                                                                                                                                                                                                                                                                                                                                                                                                                                                                                                                                                                                                                                                                                                                                                                                                                                                                                                                                                                                                                                                          |
| S217   | DE "Risperidone"                                                                                                                                                                                                                                                                                                                                                                                                                                                                                                                                                                                                                                                                                                                                                                                                                                                                                                                                                                                                                                                                                                                                                                                                                                                                                                                                                                                                                                                                                                                                           |
| S216   | DE "Reserpine"                                                                                                                                                                                                                                                                                                                                                                                                                                                                                                                                                                                                                                                                                                                                                                                                                                                                                                                                                                                                                                                                                                                                                                                                                                                                                                                                                                                                                                                                                                                                             |
| S215   | DE "Quetiapine"                                                                                                                                                                                                                                                                                                                                                                                                                                                                                                                                                                                                                                                                                                                                                                                                                                                                                                                                                                                                                                                                                                                                                                                                                                                                                                                                                                                                                                                                                                                                            |
| S214   | DE "Olanzapine"                                                                                                                                                                                                                                                                                                                                                                                                                                                                                                                                                                                                                                                                                                                                                                                                                                                                                                                                                                                                                                                                                                                                                                                                                                                                                                                                                                                                                                                                                                                                            |
| S213   | DE "Nialamide"                                                                                                                                                                                                                                                                                                                                                                                                                                                                                                                                                                                                                                                                                                                                                                                                                                                                                                                                                                                                                                                                                                                                                                                                                                                                                                                                                                                                                                                                                                                                             |
| S212   | DE "Molindone"                                                                                                                                                                                                                                                                                                                                                                                                                                                                                                                                                                                                                                                                                                                                                                                                                                                                                                                                                                                                                                                                                                                                                                                                                                                                                                                                                                                                                                                                                                                                             |
| S211   | DE "Clozapine"                                                                                                                                                                                                                                                                                                                                                                                                                                                                                                                                                                                                                                                                                                                                                                                                                                                                                                                                                                                                                                                                                                                                                                                                                                                                                                                                                                                                                                                                                                                                             |
| S210   | DE "Aripiprazole"                                                                                                                                                                                                                                                                                                                                                                                                                                                                                                                                                                                                                                                                                                                                                                                                                                                                                                                                                                                                                                                                                                                                                                                                                                                                                                                                                                                                                                                                                                                                          |
| S209   | DE "Thiothixene"                                                                                                                                                                                                                                                                                                                                                                                                                                                                                                                                                                                                                                                                                                                                                                                                                                                                                                                                                                                                                                                                                                                                                                                                                                                                                                                                                                                                                                                                                                                                           |
| S208   | DE "Pimozide"                                                                                                                                                                                                                                                                                                                                                                                                                                                                                                                                                                                                                                                                                                                                                                                                                                                                                                                                                                                                                                                                                                                                                                                                                                                                                                                                                                                                                                                                                                                                              |
| S207   | DE "Phenothiazine Derivatives"                                                                                                                                                                                                                                                                                                                                                                                                                                                                                                                                                                                                                                                                                                                                                                                                                                                                                                                                                                                                                                                                                                                                                                                                                                                                                                                                                                                                                                                                                                                             |

## Supplementary Material

BMJ Open

|      |                                                   |
|------|---------------------------------------------------|
| S206 | DE "Neuroleptic Drugs"                            |
| S205 | DE "Minor Tranquilizers"                          |
| S204 | DE "Meprobamate"                                  |
| S203 | DE "Haloperidol"                                  |
| S202 | DE "Doxepin"                                      |
| S201 | DE "Benactyzine"                                  |
| S200 | DE "Amitriptyline"                                |
| S199 | DE "Tranquilizing Drugs"                          |
| S198 | DE "Zimeldine"                                    |
| S197 | DE "Venlafaxine"                                  |
| S196 | DE "Tricyclic Antidepressant Drugs"               |
| S195 | DE "Trazodone"                                    |
| S194 | DE "Tranlycypromine"                              |
| S193 | DE "Sulpiride"                                    |
| S192 | DE "Sertraline"                                   |
| S191 | DE "Serotonin Norepinephrine Reuptake Inhibitors" |
| S190 | DE "Pipradrol"                                    |
| S189 | DE "Pheniprazine"                                 |
| S188 | DE "Phenelzine"                                   |
| S187 | DE "Paroxetine"                                   |
| S186 | DE "Nomifensine"                                  |
| S185 | DE "Nialamide"                                    |
| S184 | DE "Nefazodone"                                   |
| S183 | DE "Molindone"                                    |
| S182 | DE "Moclobemide"                                  |
| S181 | DE "Mianserin"                                    |
| S180 | DE "Methylphenidate"                              |
| S179 | DE "Lithium Carbonate"                            |
| S178 | DE "Isocarboxazid"                                |
| S177 | DE "Iproniazid"                                   |
| S176 | DE "Fluvoxamine"                                  |
| S175 | DE "Fluoxetine"                                   |
| S174 | DE "Citalopram"                                   |
| S173 | DE "Bupropion"                                    |
| S172 | DE "Antidepressant Drugs"                         |
| S171 | DE "Drug Therapy"                                 |
| S170 | DE "Virtual Reality Exposure Therapy"             |
| S169 | DE "Prolonged Exposure Therapy"                   |
| S168 | DE "In Vivo Exposure"                             |
| S167 | DE "Implosive Therapy"                            |
| S166 | DE "Imaginal Exposure"                            |
| S165 | DE "Systematic Desensitization Therapy"           |
| S164 | DE "Response Cost"                                |
| S163 | DE "Reciprocal Inhibition Therapy"                |
| S162 | DE "Implosive Therapy"                            |
| S161 | DE "Exposure Therapy"                             |
| S160 | DE "Dialectical Behavior Therapy"                 |

## Supplementary Material

BMJ Open

|      |                                        |
|------|----------------------------------------|
| S159 | DE "Conversion Therapy"                |
| S158 | DE "Aversion Therapy"                  |
| S157 | DE "Behavior Therapy"                  |
| S156 | DE "Prolonged Exposure Therapy"        |
| S155 | DE "Cognitive Processing Therapy"      |
| S154 | DE "Acceptance and Commitment Therapy" |
| S153 | DE "Workplace Intervention"            |
| S152 | DE "School Based Intervention"         |
| S151 | DE "Group Intervention"                |
| S150 | DE "Family Intervention"               |
| S149 | DE "Early Intervention"                |
| S148 | DE "Crisis Intervention"               |
| S147 | DE "Intervention"                      |
| S146 | DE "Video-Based Interventions"         |
| S145 | DE "Treatment Planning"                |
| S144 | DE "Treatment Outcomes"                |
| S143 | DE "Treatment Guidelines"              |
| S142 | DE "Trauma Treatment"                  |
| S141 | DE "Trauma-Informed Care"              |
| S140 | DE "Therapeutic Processes"             |
| S139 | DE "Symptoms Based Treatment"          |
| S138 | DE "Spiritual Care"                    |
| S137 | DE "Speech Therapy"                    |
| S136 | DE "Sociotherapy"                      |
| S135 | DE "Social Casework"                   |
| S134 | DE "Sex Therapy"                       |
| S133 | DE "Self-Help Techniques"              |
| S132 | DE "Respite Care"                      |
| S131 | DE "Pain Management"                   |
| S130 | DE "Relaxation Therapy"                |
| S129 | DE "Rehabilitation"                    |
| S128 | DE "Psychoeducation"                   |
| S127 | DE "Private Practice"                  |
| S126 | DE "Physical Treatment Methods"        |
| S125 | DE "Personal Therapy"                  |
| S124 | DE "Partial Hospitalization"           |
| S123 | DE "Outpatient Treatment"              |
| S122 | DE "Multisystemic Therapy"             |
| S121 | DE "Multimodal Treatment Approach"     |
| S120 | DE "Movement Therapy"                  |
| S119 | DE "Mindfulness-Based Interventions"   |
| S118 | DE "Mind Body Therapy"                 |
| S117 | DE "Milieu Therapy"                    |
| S116 | DE "Mental Health Programs"            |
| S115 | DE "Medical Treatment (General)"       |
| S114 | DE "Maintenance Therapy"               |
| S113 | DE "Life Sustaining Treatment"         |

## Supplementary Material

BMJ Open

|      |                                           |
|------|-------------------------------------------|
| S112 | DE "Language Therapy"                     |
| S111 | DE "Involuntary Treatment"                |
| S110 | DE "Intervention"                         |
| S109 | DE "Interdisciplinary Treatment Approach" |
| S108 | DE "Integrated Services"                  |
| S107 | DE "Institutionalization"                 |
| S106 | DE "Hydrotherapy"                         |
| S105 | DE "Human Services"                       |
| S104 | DE "Human Potential Movement"             |
| S103 | DE "Hospice"                              |
| S102 | DE "Horticulture Therapy"                 |
| S101 | DE "Health Care Services"                 |
| S100 | DE "Habilitation"                         |
| S99  | DE "Disease Management"                   |
| S98  | DE "Cross Cultural Treatment"             |
| S97  | DE "Creative Arts Therapy"                |
| S96  | DE "Counseling"                           |
| S95  | DE "Computer Assisted Therapy"            |
| S94  | DE "Cognitive Techniques"                 |
| S93  | DE "Cognitive Stimulation Therapy"        |
| S92  | DE "Cognitive Behavior Therapy"           |
| S91  | DE "Client Treatment Matching"            |
| S90  | DE "Client Transfer"                      |
| S89  | DE "Caregiving"                           |
| S88  | DE "Bibliotherapy"                        |
| S87  | DE "Behavior Modification"                |
| S86  | DE "Anxiety Management"                   |
| S85  | DE "Alternative Medicine"                 |
| S84  | DE "Aftercare"                            |
| S83  | DE "Adventure Therapy"                    |
| S82  | DE "Adjunctive Treatment"                 |
| S81  | DE "Addiction Treatment"                  |
| S80  | DE "Treatment"                            |
| S79  | DE "Transactional Analysis"               |
| S78  | DE "Supportive Psychotherapy"             |
| S77  | DE "Strategic Therapy"                    |
| S76  | DE "Solution Focused Therapy"             |
| S75  | DE "Relationship Therapy"                 |
| S74  | DE "Reality Therapy"                      |
| S73  | DE "Rational Emotive Behavior Therapy"    |
| S72  | DE "Psychotherapeutic Techniques"         |
| S71  | DE "Psychotherapeutic Counseling"         |
| S70  | DE "Psychodynamic Psychotherapy"          |
| S69  | DE "Psychodrama"                          |
| S68  | DE "Psychoanalysis"                       |
| S67  | DE "Primal Therapy"                       |
| S66  | DE "Persuasion Therapy"                   |



## Supplementary Material

BMJ Open

|     |                                                                                                                     |
|-----|---------------------------------------------------------------------------------------------------------------------|
| S65 | DE "Network Therapy"                                                                                                |
| S64 | DE "Narrative Therapy"                                                                                              |
| S63 | DE "Logotherapy"                                                                                                    |
| S62 | DE "Interpersonal Psychotherapy"                                                                                    |
| S61 | DE "Integrative Psychotherapy"                                                                                      |
| S60 | DE "Insight Therapy"                                                                                                |
| S59 | DE "Individual Psychotherapy"                                                                                       |
| S58 | DE "Hypnotherapy"                                                                                                   |
| S57 | DE "Humanistic Psychotherapy"                                                                                       |
| S56 | DE "Guided Imagery"                                                                                                 |
| S55 | DE "Group Psychotherapy"                                                                                            |
| S54 | DE "Gestalt Therapy"                                                                                                |
| S53 | DE "Geriatric Psychotherapy"                                                                                        |
| S52 | DE "Feminist Therapy"                                                                                               |
| S51 | DE "Eye Movement Desensitization Therapy"                                                                           |
| S50 | DE "Expressive Psychotherapy"                                                                                       |
| S49 | DE "Experiential Psychotherapy"                                                                                     |
| S48 | DE "Existential Therapy"                                                                                            |
| S47 | DE "Emotion Focused Therapy"                                                                                        |
| S46 | DE "Eclectic Psychotherapy"                                                                                         |
| S45 | DE "Couples Therapy"                                                                                                |
| S44 | DE "Conversion Therapy"                                                                                             |
| S43 | DE "Client Centered Therapy"                                                                                        |
| S42 | DE "Child Psychotherapy"                                                                                            |
| S41 | DE "Brief Relational Therapy"                                                                                       |
| S40 | DE "Brief Psychotherapy"                                                                                            |
| S39 | DE "Autogenic Training"                                                                                             |
| S38 | DE "Analytical Psychotherapy"                                                                                       |
| S37 | DE "Affirmative Therapy"                                                                                            |
| S36 | DE "Adolescent Psychotherapy"                                                                                       |
| S35 | DE "Adlerian Psychotherapy"                                                                                         |
| S34 | DE "Psychotherapy"                                                                                                  |
| S33 | S16 or S17 or S18 or S19 or S20 or S21 or S22 or S23 or S24 or S25 or S26 or S27 or S28 or S29 or S30 or S31 or S32 |
| S32 | TI psychological trauma or AB psychological trauma                                                                  |
| S31 | TI (early AND trauma*) or AB (early AND trauma*)                                                                    |
| S30 | TI (adverse AND child* AND experience*) or AB (adverse AND child* AND experience*)                                  |
| S29 | TI (child* AND neglect) or AB (child* AND neglect)                                                                  |
| S28 | TI (child* AND abuse) or AB (child* AND abuse)                                                                      |
| S27 | TI (child* AND maltreatment) or AB (child* AND maltreatment)                                                        |
| S26 | TI (child* AND trauma) or AB (child* AND trauma)                                                                    |
| S25 | DE "Domestic Violence"                                                                                              |
| S24 | DE "Emotional Trauma"                                                                                               |
| S23 | DE "Battered Child Syndrome"                                                                                        |
| S22 | DE "Verbal Abuse"                                                                                                   |
| S21 | DE "Sexual Abuse"                                                                                                   |

## Supplementary Material

BMJ Open

|     |                                                                                       |
|-----|---------------------------------------------------------------------------------------|
| S20 | DE "Physical Abuse"                                                                   |
| S19 | DE "Emotional Abuse"                                                                  |
| S18 | DE "Child Neglect"                                                                    |
| S17 | DE "Child Abuse"                                                                      |
| S16 | DE "Childhood Adversity"                                                              |
| S15 | S1 or S2 or S3 or S4 or S5 or S6 or S7 or S8 or S9 or S10 or S11 or S12 or S13 or S14 |
| S14 | TI BPAD OR AB BPAD                                                                    |
| S13 | TI BPD OR AB BPD                                                                      |
| S12 | TI BD OR AB BD                                                                        |
| S11 | TI hypomanic OR AB hypomanic                                                          |
| S10 | TI hypomania OR AB hypomania                                                          |
| S9  | TI manic OR AB manic                                                                  |
| S8  | TI mania OR AB mania                                                                  |
| S7  | TI cyclothymi* OR AB cyclothymi*                                                      |
| S6  | TI bipolar OR AB bipolar                                                              |
| S5  | DE "Mania"                                                                            |
| S4  | DE "Cyclothymic Disorder"                                                             |
| S3  | DE "Bipolar II Disorder"                                                              |
| S2  | DE "Bipolar I Disorder"                                                               |
| S1  | DE "Bipolar Disorder"                                                                 |

Supplementary Material

BMJ Open

**Supplementary Table 4 The search strategy for CENTRAL**

| Number | Search Terms                                                                                          |
|--------|-------------------------------------------------------------------------------------------------------|
| S44    | #12 AND #26 AND #42 (in Trials)                                                                       |
| S43    | #12 AND #26 AND #42                                                                                   |
| S42    | #27 or #28 or #29 or #30 or #31 or #32 or #33 or #34 or #35 or #36 or #37 or #38 or #39 or #40 or #41 |
| S41    | (psychoeducation):ti,ab                                                                               |
| S40    | (antipsychotic*):ti,ab                                                                                |
| S39    | (antidepressant*):ti,ab                                                                               |
| S38    | ("mood stabilizers"):ti,ab                                                                            |
| S37    | ("mood stabilisers"):ti,ab                                                                            |
| S36    | (intervention*):ti,ab                                                                                 |
| S35    | (therap*):ti,ab                                                                                       |
| S34    | (treatment*):ti,ab                                                                                    |
| S33    | MeSH descriptor: [Treatment Outcome] this term only                                                   |
| S32    | MeSH descriptor: [Lithium] this term only                                                             |
| S31    | MeSH descriptor: [Tranquilizing Agents] explode all trees                                             |
| S30    | MeSH descriptor: [Antidepressive Agents] explode all trees                                            |
| S29    | MeSH descriptor: [Drug Therapy] this term only                                                        |
| S28    | MeSH descriptor: [Cognitive Behavioral Therapy] explode all trees                                     |
| S27    | MeSH descriptor: [Psychotherapy] explode all trees                                                    |
| S26    | #13 or #14 or #15 or #16 or #17 or #18 or #19 or #20 or #21 or #22 or #23 or #24 or #25               |
| S25    | (psychological NEAR/5 trauma):ti,ab                                                                   |
| S24    | ((early AND trauma*)):ti,ab                                                                           |
| S23    | ((adverse AND child* AND experience*)):ti,ab                                                          |
| S22    | ((child* AND neglect)):ti,ab                                                                          |
| S21    | ((child* AND abuse)):ti,ab                                                                            |
| S20    | ((child* AND maltreatment)):ti,ab                                                                     |
| S19    | ((child* AND trauma)):ti,ab                                                                           |
| S18    | MeSH descriptor: [Domestic Violence] this term only                                                   |
| S17    | MeSH descriptor: [Psychological Trauma] explode all trees                                             |
| S16    | MeSH descriptor: [Battered Child Syndrome] this term only                                             |
| S15    | MeSH descriptor: [Child Abuse] explode all trees                                                      |
| S14    | MeSH descriptor: [Adverse Childhood Experiences] this term only                                       |
| S13    | MeSH descriptor: [Adult Survivors of Child Adverse Events] explode all trees                          |
| S12    | #1 or #2 or #3 or #4 or #5 or #6 or #7 or #8 or #9 or #10 or #11                                      |
| S11    | (BPAD):ti,ab                                                                                          |
| S10    | (BPD):ti,ab                                                                                           |
| S9     | (BD):ti,ab                                                                                            |
| S8     | (hypomanic):ti,ab                                                                                     |
| S7     | (hypomania):ti,ab                                                                                     |
| S6     | (manic):ti,ab                                                                                         |
| S5     | (mania):ti,ab                                                                                         |
| S4     | (cyclothymi*):ti,ab                                                                                   |
| S3     | (bipolar):ti,ab                                                                                       |
| S2     | MeSH descriptor: [Cyclothymic Disorder] this term only                                                |

Supplementary Material

*BMJ Open*

S1 MeSH descriptor: [Bipolar and Related Disorders] explode all trees
